# Supplementary material for: Transition metal-mediated donor–acceptor coordination of low-oxidation state Group 14 element halides
Source: Royal Society of Chemistry journal article supplement (doi:10.1039/c5dt03018h), 2015-09-10
Supplement: c5dt03018h1.pdf [file c5dt03018h1.pdf]

## Supporting Information

### **Transition Metal-mediated Donor-acceptor Coordination of Low-oxidation State Group 14 Element Halides**

Anindya K. Swarnakar, Michael J. Ferguson, Robert McDonald, and Eric Rivard\*

*Department of Chemistry, University of Alberta, 11227 Saskatchewan Drive, Edmonton, Alberta, Canada T6G 2G2.*

#### Contents

Crystallographic data of compound **1-6**

S2

**Table S1.** Crystallographic data for compound **1***A. Crystal Data*

|                                          |                                                                                                          |
|------------------------------------------|----------------------------------------------------------------------------------------------------------|
| formula                                  | C <sub>26</sub> H <sub>27</sub> Cl <sub>2</sub> GeO <sub>5</sub> P <sub>2</sub> RhW                      |
| formula weight                           | 911.66                                                                                                   |
| crystal dimensions (mm)                  | 0.27×0.14×0.11                                                                                           |
| crystal system                           | monoclinic                                                                                               |
| space group                              | <i>P</i> 2 <sub>1</sub> / <i>n</i> (an alternate setting of <i>P</i> 2 <sub>1</sub> / <i>c</i> [No. 14]) |
| unit cell parameters <sup>a</sup>        |                                                                                                          |
| <i>a</i> (Å)                             | 8.9888 (3)                                                                                               |
| <i>b</i> (Å)                             | 24.3719 (7)                                                                                              |
| <i>c</i> (Å)                             | 14.4140 (4)                                                                                              |
| β (deg)                                  | 104.3064 (3)                                                                                             |
| <i>V</i> (Å <sup>3</sup> )               | 3059.81 (16)                                                                                             |
| <i>Z</i>                                 | 4                                                                                                        |
| ρ <sub>calcd</sub> (g cm <sup>-3</sup> ) | 1.979                                                                                                    |
| μ (mm <sup>-1</sup> )                    | 5.572                                                                                                    |

*B. Data Collection and Refinement Conditions*

|                                                                                                        |                                                                                        |
|--------------------------------------------------------------------------------------------------------|----------------------------------------------------------------------------------------|
| diffractometer                                                                                         | Bruker D8/APEX II CCD <sup>b</sup>                                                     |
| radiation (λ [Å])                                                                                      | graphite-monochromated Mo Kα (0.71073)                                                 |
| temperature (°C)                                                                                       | -100                                                                                   |
| scan type                                                                                              | ω scans (0.3°) (15 s exposures)                                                        |
| data collection 2θ limit (deg)                                                                         | 56.65                                                                                  |
| total data collected                                                                                   | 28051 (-11≤ <i>h</i> ≤11, -32≤ <i>k</i> ≤31, -19≤ <i>l</i> ≤19)                        |
| independent reflections                                                                                | 7477 ( <i>R</i> <sub>int</sub> = 0.0162)                                               |
| number of observed reflections ( <i>NO</i> )                                                           | 7036 [ <i>F</i> <sub>o</sub> <sup>2</sup> ≥ 2σ( <i>F</i> <sub>o</sub> <sup>2</sup> )]  |
| structure solution method                                                                              | Patterson/structure expansion ( <i>DIRDIF-2008</i> <sup>c</sup> )                      |
| refinement method                                                                                      | full-matrix least-squares on <i>F</i> <sup>2</sup> ( <i>SHELXL-2013</i> <sup>d</sup> ) |
| absorption correction method                                                                           | Gaussian integration (face-indexed)                                                    |
| range of transmission factors                                                                          | 0.6400–0.3265                                                                          |
| data/restraints/parameters                                                                             | 7477 / 0 / 351                                                                         |
| goodness-of-fit ( <i>S</i> ) <sup>e</sup> [all data]                                                   | 1.058                                                                                  |
| final <i>R</i> indices <sup>f</sup>                                                                    |                                                                                        |
| <i>R</i> <sub>1</sub> [ <i>F</i> <sub>o</sub> <sup>2</sup> ≥ 2σ( <i>F</i> <sub>o</sub> <sup>2</sup> )] | 0.0160                                                                                 |
| <i>wR</i> <sub>2</sub> [all data]                                                                      | 0.0379                                                                                 |
| largest difference peak and hole                                                                       | 1.032 and -0.480 e Å <sup>-3</sup>                                                     |

<sup>a</sup>Obtained from least-squares refinement of 9932 reflections with 4.44° < 2θ < 56.48°.

<sup>b</sup>Programs for diffractometer operation, data collection, data reduction and absorption correction were those supplied by Bruker.

<sup>c</sup>P. T. Beurskens, G. Beurskens, R. de Gelder, J. M. M. Smits, S. Garcia-Granda and R. Gould,

O. (2008). The *DIRDIF-2008* program system. Crystallography Laboratory, Radboud University Nijmegen,

<sup>d</sup>G. M. Sheldrick, *Acta Crystallogr.*2008, **A64**, 112–122.

<sup>e</sup> $S = [\Sigma w(F_o^2 - F_c^2)^2 / (n - p)]^{1/2}$  ( $n$  = number of data;  $p$  = number of parameters varied;  $w = [\sigma^2(F_o^2) + (0.0187P)^2 + 1.4453P]^{-1}$  where  $P = [\text{Max}(F_o^2, 0) + 2F_c^2]/3$ ).

<sup>f</sup> $R_1 = \Sigma ||F_o| - |F_c|| / \Sigma |F_o|$ ;  $wR_2 = [\Sigma w(F_o^2 - F_c^2)^2 / \Sigma w(F_o^4)]^{1/2}$ .

**Table S2.** Crystallographic data for compound **2***A. Crystal Data*

|                                          |                                                                                                          |
|------------------------------------------|----------------------------------------------------------------------------------------------------------|
| formula                                  | C <sub>26.25</sub> H <sub>27.5</sub> Cl <sub>2.5</sub> O <sub>5</sub> P <sub>2</sub> RhSnW               |
| formula weight                           | 979.00                                                                                                   |
| crystal dimensions (mm)                  | 0.27 × 0.02 × 0.02                                                                                       |
| crystal system                           | monoclinic                                                                                               |
| space group                              | <i>P</i> 2 <sub>1</sub> / <i>n</i> (an alternate setting of <i>P</i> 2 <sub>1</sub> / <i>c</i> [No. 14]) |
| unit cell parameters <sup>a</sup>        |                                                                                                          |
| <i>a</i> (Å)                             | 15.3972 (2)                                                                                              |
| <i>b</i> (Å)                             | 9.0453 (1)                                                                                               |
| <i>c</i> (Å)                             | 23.3877 (3)                                                                                              |
| β (deg)                                  | 90.5374 (12)                                                                                             |
| <i>V</i> (Å <sup>3</sup> )               | 3257.12 (7)                                                                                              |
| <i>Z</i>                                 | 4                                                                                                        |
| ρ <sub>calcd</sub> (g cm <sup>-3</sup> ) | 1.996                                                                                                    |
| μ (mm <sup>-1</sup> )                    | 19.58                                                                                                    |

*B. Data Collection and Refinement Conditions*

|                                                                                                        |                                                                                          |
|--------------------------------------------------------------------------------------------------------|------------------------------------------------------------------------------------------|
| diffractometer                                                                                         | Bruker D8/APEX II CCD <sup>b</sup>                                                       |
| radiation (λ [Å])                                                                                      | Cu Kα (1.54178) (microfocus source)                                                      |
| temperature (°C)                                                                                       | -100                                                                                     |
| scan type                                                                                              | ω and φ scans (1.0°) (5 s exposures)                                                     |
| data collection 2θ limit (deg)                                                                         | 145.17                                                                                   |
| total data collected                                                                                   | 21691 (-19 ≤ <i>h</i> ≤ 18, -11 ≤ <i>k</i> ≤ 11, -28 ≤ <i>l</i> ≤ 28)                    |
| independent reflections                                                                                | 6344 ( <i>R</i> <sub>int</sub> = 0.0781)                                                 |
| number of observed reflections ( <i>NO</i> )                                                           | 5092 [ <i>F</i> <sub>o</sub> <sup>2</sup> ≥ 2σ( <i>F</i> <sub>o</sub> <sup>2</sup> )]    |
| structure solution method                                                                              | Patterson/structure expansion ( <i>DIRDIF-2008</i> <sup>c</sup> )                        |
| refinement method                                                                                      | full-matrix least-squares on <i>F</i> <sup>2</sup> ( <i>SHELXL-2013</i> <sup>d,e</sup> ) |
| absorption correction method                                                                           | Gaussian integration (face-indexed)                                                      |
| range of transmission factors                                                                          | 0.8514–0.1190                                                                            |
| data/restraints/parameters                                                                             | 6344 / 0 / 347                                                                           |
| goodness-of-fit ( <i>S</i> ) <sup>f</sup> [all data]                                                   | 1.031                                                                                    |
| final <i>R</i> indices <sup>g</sup>                                                                    |                                                                                          |
| <i>R</i> <sub>1</sub> [ <i>F</i> <sub>o</sub> <sup>2</sup> ≥ 2σ( <i>F</i> <sub>o</sub> <sup>2</sup> )] | 0.0345                                                                                   |
| <i>wR</i> <sub>2</sub> [all data]                                                                      | 0.0868                                                                                   |
| largest difference peak and hole                                                                       | 1.130 and -1.373 e Å <sup>-3</sup>                                                       |

<sup>a</sup>Obtained from least-squares refinement of 9963 reflections with 6.84° < 2θ < 143.88°.

<sup>b</sup>Programs for diffractometer operation, data collection, data reduction and absorption correction were those supplied by Bruker.

<sup>c</sup>P. T. Beurskens, G. Beurskens, R. de Gelder, J. M. M. Smits, S. Garcia-Granda and R. Gould,

O. (2008). The *DIRDIF-2008* program system. Crystallography Laboratory, Radboud University Nijmegen,

<sup>d</sup>G. M. Sheldrick, *Acta Crystallogr.*2008, **A64**, 112–122.

<sup>e</sup>Attempts to refine peaks of residual electron density as disordered or partial-occupancy solvent dichloromethane chlorine or carbon atoms were unsuccessful. The data were corrected for disordered electron density through use of the SQUEEZE procedure (P. van der Sluis and A. L. Spek, *Acta Crystallogr.*1990, **A46**, 194–201) as implemented in *PLATON* (A.L. Spek, *Acta Crystallogr.*1990, **A46**, C34; A. L. Spek, *J. Appl. Cryst.*2003, **36**, 7–13. *PLATON* - a multipurpose crystallographic tool. UtrechtUniversity, Utrecht, The Netherlands). A total solvent-accessible void volume of 225.6Å<sup>3</sup> with a total electron count of 43 (consistent with one molecule of solvent CH<sub>2</sub>Cl<sub>2</sub>, or 0.25 molecule per formula unit of the metal complex molecule) was found in the unit cell.

$$fS = [\Sigma w(F_o^2 - F_c^2)^2 / (n - p)]^{1/2} \quad (n = \text{number of data; } p = \text{number of parameters varied; } w = [\sigma^2(F_o^2) + (0.0403P)^2 + 0.9612P]^{-1} \text{ where } P = [\text{Max}(F_o^2, 0) + 2F_c^2] / 3).$$

$$gR_1 = \Sigma ||F_o| - |F_c|| / \Sigma |F_o|; \quad wR_2 = [\Sigma w(F_o^2 - F_c^2)^2 / \Sigma w(F_o^4)]^{1/2}.$$

**Table S3.** Crystallographic data for compound **3***A. Crystal Data*

|                                          |                                                                                                          |
|------------------------------------------|----------------------------------------------------------------------------------------------------------|
| formula                                  | C <sub>21</sub> H <sub>27</sub> Cl <sub>2</sub> P <sub>2</sub> PbRh                                      |
| formula weight                           | 722.36                                                                                                   |
| crystal dimensions (mm)                  | 0.09 × 0.08 × 0.07                                                                                       |
| crystal system                           | monoclinic                                                                                               |
| space group                              | <i>P</i> 2 <sub>1</sub> / <i>n</i> (an alternate setting of <i>P</i> 2 <sub>1</sub> / <i>c</i> [No. 14]) |
| unit cell parameters <sup>a</sup>        |                                                                                                          |
| <i>a</i> (Å)                             | 17.346 (5)                                                                                               |
| <i>b</i> (Å)                             | 15.351 (4)                                                                                               |
| <i>c</i> (Å)                             | 18.164 (5)                                                                                               |
| β (deg)                                  | 95.470 (3)                                                                                               |
| <i>V</i> (Å <sup>3</sup> )               | 4814 (2)                                                                                                 |
| <i>Z</i>                                 | 8                                                                                                        |
| ρ <sub>calcd</sub> (g cm <sup>-3</sup> ) | 1.993                                                                                                    |
| μ (mm <sup>-1</sup> )                    | 8.030                                                                                                    |

*B. Data Collection and Refinement Conditions*

|                                                                                                        |                                                                                        |
|--------------------------------------------------------------------------------------------------------|----------------------------------------------------------------------------------------|
| diffractometer                                                                                         | Bruker D8/APEX II CCD <sup>b</sup>                                                     |
| radiation (λ [Å])                                                                                      | graphite-monochromated Mo Kα (0.71073)                                                 |
| temperature (°C)                                                                                       | -100                                                                                   |
| scan type                                                                                              | ω scans (0.3°) (20 s exposures)                                                        |
| data collection 2θ limit (deg)                                                                         | 55.52                                                                                  |
| total data collected                                                                                   | 41795 (-22 ≤ <i>h</i> ≤ 22, -19 ≤ <i>k</i> ≤ 19, -23 ≤ <i>l</i> ≤ 23)                  |
| independent reflections                                                                                | 11064 ( <i>R</i> <sub>int</sub> = 0.0573)                                              |
| number of observed reflections ( <i>NO</i> )                                                           | 8280 [ <i>F</i> <sub>o</sub> <sup>2</sup> ≥ 2σ( <i>F</i> <sub>o</sub> <sup>2</sup> )]  |
| structure solution method                                                                              | intrinsic phasing ( <i>SHELXT-2014</i> <sup>c</sup> )                                  |
| refinement method                                                                                      | full-matrix least-squares on <i>F</i> <sup>2</sup> ( <i>SHELXL-2013</i> <sup>c</sup> ) |
| absorption correction method                                                                           | Gaussian integration (face-indexed)                                                    |
| range of transmission factors                                                                          | 0.7619–0.5292                                                                          |
| data/restraints/parameters                                                                             | 11064 / 0 / 495                                                                        |
| goodness-of-fit ( <i>S</i> ) <sup>d</sup> [all data]                                                   | 1.120                                                                                  |
| final <i>R</i> indices <sup>e</sup>                                                                    |                                                                                        |
| <i>R</i> <sub>1</sub> [ <i>F</i> <sub>o</sub> <sup>2</sup> ≥ 2σ( <i>F</i> <sub>o</sub> <sup>2</sup> )] | 0.0364                                                                                 |
| <i>wR</i> <sub>2</sub> [all data]                                                                      | 0.0816                                                                                 |
| largest difference peak and hole                                                                       | 1.992 and -1.824 e Å <sup>-3</sup>                                                     |

<sup>a</sup>Obtained from least-squares refinement of 9990 reflections with 4.50° < 2θ < 53.30°.

<sup>b</sup>Programs for diffractometer operation, data collection, data reduction and absorption correction were those supplied by Bruker.

<sup>c</sup>G. M. Sheldrick, *Acta Crystallogr.* 2008, **A64**, 112–122.

<sup>d</sup>*S* = [Σ*w*(*F*<sub>o</sub><sup>2</sup> - *F*<sub>c</sub><sup>2</sup>)/(*n* - *p*)]<sup>1/2</sup> (*n* = number of data; *p* = number of parameters varied; *w* =

$$[\sigma^2(F_o^2) + (0.0316P)^2]^{-1} \text{ where } P = [\text{Max}(F_o^2, 0) + 2F_c^2]/3.$$
$$eR_1 = \Sigma||F_o| - |F_c||/\Sigma|F_o|; wR_2 = [\Sigma w(F_o^2 - F_c^2)^2/\Sigma w(F_o^4)]^{1/2}.$$

**Table S4.** Crystallographic data for compound **4***A. Crystal Data*

|                                             |                                                                    |
|---------------------------------------------|--------------------------------------------------------------------|
| formula                                     | C <sub>48</sub> H <sub>43</sub> BF <sub>18</sub> P <sub>2</sub> Rh |
| formula weight                              | 1137.48                                                            |
| crystal dimensions (mm)                     | 0.26×0.20×0.16                                                     |
| crystal system                              | triclinic                                                          |
| space group                                 | <i>P</i> $\bar{1}$ (No. 2)                                         |
| unit cell parameters <sup>a</sup>           |                                                                    |
| <i>a</i> (Å)                                | 12.2135 (3)                                                        |
| <i>b</i> (Å)                                | 12.5991 (3)                                                        |
| <i>c</i> (Å)                                | 17.0103 (4)                                                        |
| $\alpha$ (deg)                              | 80.6961 (10)                                                       |
| $\beta$ (deg)                               | 81.3382 (8)                                                        |
| $\gamma$ (deg)                              | 75.2500 (8)                                                        |
| <i>V</i> (Å <sup>3</sup> )                  | 2481.49 (10)                                                       |
| <i>Z</i>                                    | 2                                                                  |
| $\rho_{\text{calcd}}$ (g cm <sup>-3</sup> ) | 1.522                                                              |
| $\mu$ (mm <sup>-1</sup> )                   | 4.305                                                              |

*B. Data Collection and Refinement Conditions*

|                                                       |                                                                          |
|-------------------------------------------------------|--------------------------------------------------------------------------|
| diffractometer                                        | Bruker D8/APEX II CCD <sup>b</sup>                                       |
| radiation ( $\lambda$ [Å])                            | Cu K $\alpha$ (1.54178) (microfocus source)                              |
| temperature (°C)                                      | -100                                                                     |
| scan type                                             | $\omega$ and $\phi$ scans (1.0°) (5 s exposures)                         |
| data collection $2\theta$ limit (deg)                 | 144.46                                                                   |
| total data collected                                  | 17405 (-15 $\leq h \leq$ 15, -15 $\leq k \leq$ 15, -21 $\leq l \leq$ 20) |
| independent reflections                               | 9416 ( $R_{\text{int}} = 0.0129$ )                                       |
| number of observed reflections ( <i>NO</i> )          | 9241 [ $F_o^2 \geq 2\sigma(F_o^2)$ ]                                     |
| structure solution method                             | intrinsic phasing ( <i>SHELXT-2014</i> <sup>c</sup> )                    |
| refinement method                                     | full-matrix least-squares on $F^2$ ( <i>SHELXL-2014</i> <sup>d,e</sup> ) |
| absorption correction method                          | Gaussian integration (face-indexed)                                      |
| range of transmission factors                         | 0.6786–0.4912                                                            |
| data/restraints/parameters                            | 9416 / 0 / 716                                                           |
| goodness-of-fit ( $S$ ) <sup>f</sup> [all data]       | 1.026                                                                    |
| final <i>R</i> indices <sup>g</sup>                   |                                                                          |
| <i>R</i> <sub>1</sub> [ $F_o^2 \geq 2\sigma(F_o^2)$ ] | 0.0319                                                                   |
| <i>wR</i> <sub>2</sub> [all data]                     | 0.0860                                                                   |
| largest difference peak and hole                      | 1.112 and -0.806 e Å <sup>-3</sup>                                       |

<sup>a</sup>Obtained from least-squares refinement of 9844 reflections with  $8.46^\circ < 2\theta < 144.24^\circ$ .

<sup>b</sup>Programs for diffractometer operation, data collection, data reduction and absorption correction were those supplied by Bruker.

<sup>c</sup>G. M. Sheldrick, *Acta Crystallogr.* 2015, **A71**, 3–8. (*SHELXT-2014*)



<sup>d</sup>G. M. Sheldrick, G. M. *Acta Crystallogr.* 2015, **C71**, 3–8. (*SHELXL-2014*)

<sup>e</sup>Attempts to refine peaks of residual electron density as disordered or partial-occupancy solvent hexane carbon atoms were unsuccessful. The data were corrected for disordered electron density through use of the SQUEEZE procedure as implemented in *PLATON* (A. L. Spek, *Acta Crystallogr.* 2015, **C71**, 9–18. *PLATON* - a multipurpose crystallographic tool. Utrecht University, Utrecht, The Netherlands). A total solvent-accessible void volume of 221 Å<sup>3</sup> with a total electron count of 50 (consistent with 1 molecule of solvent hexane, or 0.5 molecules per formula unit of the rhodium complex) was found in the unit cell.

$$fS = [\Sigma w(F_o^2 - F_c^2)^2 / (n - p)]^{1/2} \quad (n = \text{number of data; } p = \text{number of parameters varied; } w = [\sigma^2(F_o^2) + (0.0493P)^2 + 2.1386P]^{-1} \text{ where } P = [\text{Max}(F_o^2, 0) + 2F_c^2] / 3).$$

$$gR_1 = \Sigma ||F_o| - |F_c|| / \Sigma |F_o|; \quad wR_2 = [\Sigma w(F_o^2 - F_c^2)^2 / \Sigma w(F_o^4)]^{1/2}.$$

**Table S5.** Crystallographic data for compound **5***A. Crystal Data*

|                                             |                                                                                     |
|---------------------------------------------|-------------------------------------------------------------------------------------|
| formula                                     | C <sub>44</sub> H <sub>73</sub> Cl <sub>2</sub> GeO <sub>5</sub> P <sub>2</sub> PtW |
| formula weight                              | 1266.39                                                                             |
| crystal dimensions (mm)                     | 0.29×0.09×0.06                                                                      |
| crystal system                              | triclinic                                                                           |
| space group                                 | <i>P</i> $\bar{1}$ (No. 2)                                                          |
| unit cell parameters <sup>a</sup>           |                                                                                     |
| <i>a</i> (Å)                                | 10.172 (2)                                                                          |
| <i>b</i> (Å)                                | 12.807 (3)                                                                          |
| <i>c</i> (Å)                                | 20.478 (4)                                                                          |
| $\alpha$ (deg)                              | 105.848 (2)                                                                         |
| $\beta$ (deg)                               | 103.959 (2)                                                                         |
| $\gamma$ (deg)                              | 93.004 (3)                                                                          |
| <i>V</i> (Å <sup>3</sup> )                  | 2470.6 (8)                                                                          |
| <i>Z</i>                                    | 2                                                                                   |
| $\rho_{\text{calcd}}$ (g cm <sup>-3</sup> ) | 1.702                                                                               |
| $\mu$ (mm <sup>-1</sup> )                   | 5.964                                                                               |

*B. Data Collection and Refinement Conditions*

|                                                       |                                                                              |
|-------------------------------------------------------|------------------------------------------------------------------------------|
| diffractometer                                        | BrukerD8/APEX II CCD <sup>b</sup>                                            |
| radiation ( $\lambda$ [Å])                            | graphite-monochromated Mo K $\alpha$ (0.71073)                               |
| temperature (°C)                                      | −100                                                                         |
| scan type                                             | $\omega$ scans (0.3°) (20 s exposures)                                       |
| data collection $2\theta$ limit (deg)                 | 55.18                                                                        |
| total data collected                                  | 22384 ( $-13 \leq h \leq 13$ , $-16 \leq k \leq 16$ , $-26 \leq l \leq 26$ ) |
| independent reflections                               | 11338 ( $R_{\text{int}} = 0.0148$ )                                          |
| number of observed reflections ( <i>NO</i> )          | 9930 [ $F_o^2 \geq 2\sigma(F_o^2)$ ]                                         |
| structure solution method                             | intrinsic phasing ( <i>SHELXT</i> <sup>c</sup> )                             |
| refinement method                                     | full-matrix least-squares on $F^2$ ( <i>SHELXL-2013</i> <sup>c</sup> )       |
| absorption correction method                          | Gaussian integration (face-indexed)                                          |
| range of transmission factors                         | 0.7960–0.3812                                                                |
| data/restraints/parameters                            | 11338 / 3 <sup>d</sup> / 534                                                 |
| goodness-of-fit ( <i>S</i> ) <sup>e</sup> [all data]  | 1.117                                                                        |
| final <i>R</i> indices <sup>f</sup>                   |                                                                              |
| <i>R</i> <sub>1</sub> [ $F_o^2 \geq 2\sigma(F_o^2)$ ] | 0.0212                                                                       |
| <i>wR</i> <sub>2</sub> [all data]                     | 0.0603                                                                       |
| largest difference peak and hole                      | 1.248 and −1.042 e Å <sup>-3</sup>                                           |

<sup>a</sup>Obtained from least-squares refinement of 9783 reflections with  $4.46^\circ < 2\theta < 55.04^\circ$ .

<sup>b</sup>Programs for diffractometer operation, data collection, data reduction and absorption correction were those supplied by Bruker.

<sup>c</sup>G. M. Sheldrick, *Acta Crystallogr.* 2008, **A64**, 112–122.

<sup>d</sup>The C–C distances within the minor component of the disordered solvent hexane molecule were restrained to be approximately equal by use of the *SHELXLSADI* instruction.

<sup>e</sup> $S = [\sum w(F_o^2 - F_c^2)^2 / (n - p)]^{1/2}$  ( $n$  = number of data;  $p$  = number of parameters varied;  $w = [\sigma^2(F_o^2) + (0.0333P)^2 + 0.5140P]^{-1}$  where  $P = [\text{Max}(F_o^2, 0) + 2F_c^2]/3$ ).

<sup>f</sup> $R_1 = \sum ||F_o| - |F_c|| / \sum |F_o|$ ;  $wR_2 = [\sum w(F_o^2 - F_c^2)^2 / \sum w(F_o^4)]^{1/2}$ .

**Table S6.** Crystallographic data for compound **6***A. Crystal Data*

|                                             |                                                                                     |
|---------------------------------------------|-------------------------------------------------------------------------------------|
| formula                                     | C <sub>41</sub> H <sub>66</sub> Cl <sub>2</sub> O <sub>5</sub> P <sub>2</sub> PtSnW |
| formula weight                              | 1355.58                                                                             |
| crystal dimensions (mm)                     | 0.23×0.18×0.09                                                                      |
| crystal system                              | orthorhombic                                                                        |
| space group                                 | <i>P</i> 2 <sub>1</sub> 2 <sub>1</sub> 2 <sub>1</sub> (No. 19)                      |
| unit cell parameters <sup>a</sup>           |                                                                                     |
| <i>a</i> (Å)                                | 14.8910 (4)                                                                         |
| <i>b</i> (Å)                                | 16.3240 (4)                                                                         |
| <i>c</i> (Å)                                | 22.1599 (6)                                                                         |
| <i>V</i> (Å <sup>3</sup> )                  | 5386.6 (2)                                                                          |
| <i>Z</i>                                    | 4                                                                                   |
| $\rho_{\text{calcd}}$ (g cm <sup>-3</sup> ) | 1.672                                                                               |
| $\mu$ (mm <sup>-1</sup> )                   | 5.379                                                                               |

*B. Data Collection and Refinement Conditions*

|                                                       |                                                                              |
|-------------------------------------------------------|------------------------------------------------------------------------------|
| diffractometer                                        | Bruker D8/APEX II CCD <sup>b</sup>                                           |
| radiation ( $\lambda$ [Å])                            | graphite-monochromated Mo K $\alpha$ (0.71073)                               |
| temperature (°C)                                      | -100                                                                         |
| scan type                                             | $\omega$ scans (0.3°) (20 s exposures)                                       |
| data collection $2\theta$ limit (deg)                 | 54.98                                                                        |
| total data collected                                  | 47820 ( $-19 \leq h \leq 19$ , $-21 \leq k \leq 21$ , $-28 \leq l \leq 28$ ) |
| independent reflections                               | 12339 ( $R_{\text{int}} = 0.0289$ )                                          |
| number of observed reflections ( <i>NO</i> )          | 11780 [ $F_o^2 \geq 2\sigma(F_o^2)$ ]                                        |
| structure solution method                             | intrinsic phasing ( <i>SHELXT</i> <sup>c</sup> )                             |
| refinement method                                     | full-matrix least-squares on $F^2$ ( <i>SHELXL-2013</i> <sup>c</sup> )       |
| absorption correction method                          | Gaussian integration (face-indexed)                                          |
| range of transmission factors                         | 0.6982–0.4584                                                                |
| data/restraints/parameters                            | 12339 / 18 <sup>d</sup> / 512                                                |
| Flack absolute structure parameter <sup>e</sup>       | 0.0093(19)                                                                   |
| goodness-of-fit ( $S$ ) <sup>f</sup> [all data]       | 1.005                                                                        |
| final <i>R</i> indices <sup>g</sup>                   |                                                                              |
| <i>R</i> <sub>1</sub> [ $F_o^2 \geq 2\sigma(F_o^2)$ ] | 0.0176                                                                       |
| <i>wR</i> <sub>2</sub> [all data]                     | 0.0404                                                                       |
| largest difference peak and hole                      | 0.737 and -0.323 e Å <sup>-3</sup>                                           |

<sup>a</sup>Obtained from least-squares refinement of 9906 reflections with  $4.44^\circ < 2\theta < 51.62^\circ$ .

<sup>b</sup>Programs for diffractometer operation, data collection, data reduction and absorption correction were those supplied by Bruker.

<sup>c</sup>G. M. Sheldrick, *Acta Crystallogr.* 2008, **A64**, 112–122.

<sup>d</sup>Distances within the disordered solvent n-hexane molecule were restrained to idealized target

distances during refinement:  $d(\text{C1SA-C2SA}) = d(\text{C2SA-C3SA}) = d(\text{C3SA-C4SA}) = d(\text{C4SA-C5SA}) = d(\text{C5SA-C6SA}) = d(\text{C1SB-C2SB}) = d(\text{C2SB-C3SB}) = d(\text{C3SB-C4SB}) = d(\text{C4SA-C5SB}) = d(\text{C5SB-C6SB}) = 1.50(1) \text{ \AA}$ ;  $d(\text{C1SA}\cdots\text{C3SA}) = d(\text{C2SA}\cdots\text{C4SA}) = d(\text{C3SA}\cdots\text{C5SA}) = d(\text{C4SA}\cdots\text{C6SA}) = d(\text{C1SB}\cdots\text{C3SB}) = d(\text{C2SB}\cdots\text{C4SB}) = d(\text{C3SB}\cdots\text{C5SB}) = d(\text{C4SB}\cdots\text{C6SB}) = 2.45(1) \text{ \AA}$ .

<sup>e</sup>H. D. Flack, *Acta Crystallogr.*1983, **A39**, 876–881; H. D. Flack, G. Bernardinelli, *Acta Crystallogr.*1999, **A55**, 908–915; H.D. Flack, G. Bernardinelli, *J. Appl. Cryst.*2000, **33**, 1143–1148. The Flack parameter will refine to a value near zero if the structure is in the correct configuration and will refine to a value near one for the inverted configuration.

$fS = [\sum w(F_o^2 - F_c^2)^2 / (n - p)]^{1/2}$  ( $n$  = number of data;  $p$  = number of parameters varied;  $w = [\sigma^2(F_o^2) + (0.0115P)^2]^{-1}$  where  $P = [\text{Max}(F_o^2, 0) + 2F_c^2]/3$ ).

$gR_1 = \sum ||F_o| - |F_c|| / \sum |F_o|$ ;  $wR_2 = [\sum w(F_o^2 - F_c^2)^2 / \sum w(F_o^4)]^{1/2}$ .
